# Supplementary material for: Variation in Acute Care Rehabilitation and 30-Day Hospital Readmission or Mortality in Adult Patients With Pneumonia
Source: PubMed Central journal article supplement (PMC7489809; doi:10.1001/jamanetworkopen.2020.12979), 2020-09-04
Supplement: jamanetwopen-e2012979-s001.pdf [file jamanetwopen-e2012979-s001.pdf]

## Supplementary Online Content

Freburger JK, Chou A, Euloth T, Matcho B. Variation in acute care rehabilitation and 30-day hospital readmission or mortality in adult patients with pneumonia. *JAMA Netw Open*. 2020;3(9):e2012979. doi:10.1001/jamanetworkopen.2020.12979

**eTable 1.** ICD-10 Diagnosis Codes for Pneumonia

**eTable 2.** Variable Definitions and Specifications for Modelling

**eTable 3.** Association of Therapy Visits With 30-day Readmission or Death

**eTable 4.** Results of Sensitivity Analyses Excluding Individuals Who Died or Had Missing Data

**eTable 5.** Sensitivity Analysis With Total Visits Categorized by Quartile Distribution

**eTable 6.** Cox Regression Analysis of the Association of Therapy Visits With 30-day Readmission or Death

This supplementary material has been provided by the authors to give readers additional information about their work.

**eTable 1. ICD-10 Diagnosis Codes for Pneumonia**

| DIAGNOSIS CODE | DIAGNOSIS DESCRIPTION                                        |
|----------------|--------------------------------------------------------------|
| A481           | LEGIONNAIRES' DISEASE                                        |
| B440           | INVASIVE PULMONARY ASPERGILLOSIS                             |
| J1082          | INFLUENZA DUE TO OTH IDENT INFLUENZA VIRUS W MYOCARDITIS     |
| J129           | VIRAL PNEUMONIA, UNSPECIFIED                                 |
| J159           | UNSPECIFIED BACTERIAL PNEUMONIA                              |
| J1289          | OTHER VIRAL PNEUMONIA                                        |
| J13            | PNEUMONIA DUE TO STREPTOCOCCUS PNEUMONIAE                    |
| J154           | PNEUMONIA DUE TO OTHER STREPTOCOCCI                          |
| J158           | PNEUMONIA DUE TO OTHER SPECIFIED BACTERIA                    |
| J168           | PNEUMONIA DUE TO OTHER SPECIFIED INFECTIOUS ORGANISMS        |
| J180           | BRONCHOPNEUMONIA, UNSPECIFIED ORGANISM                       |
| J1081          | INFLUENZA DUE TO OTH IDENT INFLUENZA VIRUS W ENCEPHALOPATHY  |
| J1100          | FLU DUE TO UNIDENTIFIED FLU VIRUS W UNSP TYPE OF PNEUMONIA   |
| J112           | INFLUENZA DUE TO UNIDENTIFIED INFLUENZA VIRUS W GI MANIFEST  |
| J1281          | PNEUMONIA DUE TO SARS-ASSOCIATED CORONAVIRUS                 |
| J14            | PNEUMONIA DUE TO HEMOPHILUS INFLUENZAE                       |
| J151           | PNEUMONIA DUE TO PSEUDOMONAS                                 |
| B250           | CYTOMEGALOVIRAL PNEUMONITIS                                  |
| J1000          | FLU DUE TO OTH IDENT FLU VIRUS W UNSP TYPE OF PNEUMONIA      |
| J101           | FLU DUE TO OTH IDENT INFLUENZA VIRUS W OTH RESP MANIFEST     |
| J102           | INFLUENZA DUE TO OTH IDENT INFLUENZA VIRUS W GI MANIFEST     |
| J1181          | FLU DUE TO UNIDENTIFIED INFLUENZA VIRUS W ENCEPHALOPATHY     |
| J120           | ADENOVIRAL PNEUMONIA                                         |
| J1520          | PNEUMONIA DUE TO STAPHYLOCOCCUS, UNSPECIFIED                 |
| J156           | PNEUMONIA DUE TO OTHER AEROBIC GRAM-NEGATIVE BACTERIA        |
| J181           | LOBAR PNEUMONIA, UNSPECIFIED ORGANISM                        |
| A3791          | WHOOPING COUGH, UNSPECIFIED SPECIES WITH PNEUMONIA           |
| J1083          | INFLUENZA DUE TO OTH IDENT INFLUENZA VIRUS W OTITIS MEDIA    |
| J1089          | INFLUENZA DUE TO OTH IDENT INFLUENZA VIRUS W OTH MANIFEST    |
| J121           | RESPIRATORY SYNCYTIAL VIRUS PNEUMONIA                        |
| J122           | PARAINFLUENZA VIRUS PNEUMONIA                                |
| J123           | HUMAN METAPNEUMOVIRUS PNEUMONIA                              |
| J150           | PNEUMONIA DUE TO KLEBSIELLA PNEUMONIAE                       |
| J1108          | FLU DUE TO UNIDENTIFIED FLU VIRUS W SPECIFIED PNEUMONIA      |
| J111           | FLU DUE TO UNIDENTIFIED INFLUENZA VIRUS W OTH RESP MANIFEST  |
| J153           | PNEUMONIA DUE TO STREPTOCOCCUS, GROUP B                      |
| J157           | PNEUMONIA DUE TO MYCOPLASMA PNEUMONIAE                       |
| J17            | PNEUMONIA IN DISEASES CLASSIFIED ELSEWHERE                   |
| A3781          | WHOOPING COUGH DUE TO OTH BORDETELLA SPECIES WITH PNEUMONIA  |
| J1001          | FLU DUE TO OTH IDENT FLU VIRUS W SAME OTH IDENT FLU VIRUS PN |
| J15212         | PNEUMONIA DUE TO METHICILLIN RESISTANT STAPHYLOCOCCUS AUREUS |
| J160           | CHLAMYDIAL PNEUMONIA                                         |
| J690           | PNEUMONITIS DUE TO INHALATION OF FOOD AND VOMIT              |
| A3701          | WHOOPING COUGH DUE TO BORDETELLA PERTUSSIS WITH PNEUMONIA    |
| J1008          | INFLUENZA DUE TO OTH IDENT INFLUENZA VIRUS W OTH PNEUMONIA   |
| J1189          | INFLUENZA DUE TO UNIDENTIFIED INFLUENZA VIRUS W OTH MANIFEST |
| J15211         | PNEUMONIA DUE TO METHICILLIN SUSCEP STAPH                    |

**eTable 1. ICD-10 Diagnosis Codes for Pneumonia (continued)**

| DIAGNOSIS CODE | DIAGNOSIS DESCRIPTION                 |
|----------------|---------------------------------------|
| J1529          | PNEUMONIA DUE TO OTHER STAPHYLOCOCCUS |
| J155           | PNEUMONIA DUE TO ESCHERICHIA COLI     |
| J188           | OTHER PNEUMONIA, UNSPECIFIED ORGANISM |
| J189           | PNEUMONIA, UNSPECIFIED ORGANISM       |

**eTable 2. Variable Definitions and Specifications for Modelling**

| Variable                          | Definition                                                                                                                                                                                                                                                                           | Source                                           |
|-----------------------------------|--------------------------------------------------------------------------------------------------------------------------------------------------------------------------------------------------------------------------------------------------------------------------------------|--------------------------------------------------|
| <b>Demographics</b>               |                                                                                                                                                                                                                                                                                      |                                                  |
| Sex                               | Categorized as: Male, Female                                                                                                                                                                                                                                                         | UPMC Discharge and Inpatient Billing Data        |
| Race                              | Categorized as: White, Black, Other<br>Missing data replaced with “white”                                                                                                                                                                                                            | UPMC Discharge and Inpatient Billing Data        |
| Age                               | Categorized as: 18 – 55 years, 56 – 65 years, 66 – 75 years, 76 – 85 years, 86 years and older                                                                                                                                                                                       | UPMC Discharge and Inpatient Billing Data        |
| Insurance                         | Categorized as: Commercial/Other, Medicare, Medicaid                                                                                                                                                                                                                                 | UPMC Discharge and Inpatient Billing Data        |
| Median Household Income           | Based on patient ZIP code and categorized based on the quartile distribution; mean value imputed for missing data                                                                                                                                                                    | Census Data                                      |
| <b>Clinical</b>                   |                                                                                                                                                                                                                                                                                      |                                                  |
| Length of stay                    | Categorized as: 0 – 3 days, >3 – 6 days, >6 – 11 days, >11 days based on quartile distribution                                                                                                                                                                                       | UPMC Discharge and Inpatient Billing Data        |
| ICU use                           | Yes/no: Intensive care unit use during inpatient stay                                                                                                                                                                                                                                | UPMC Discharge and Inpatient Billing Data        |
| Severity of Illness               | APR-DRG classification: categorized as minor, moderate, major, extreme                                                                                                                                                                                                               | UPMC Discharge and Inpatient Billing Data        |
| Risk of Mortality                 | APR-DRG classification: categorized as minor, moderate, major, extreme; mean value imputed for missing data                                                                                                                                                                          | UPMC Discharge and Inpatient Billing Data        |
| Indicators for comorbidities      | Yes/ no: arrhythmia, pulmonary circulatory disease, neurologic disorder, renal failure, liver disease, cancer, coagulopathy, obesity, weight loss                                                                                                                                    | UPMC Discharge and Inpatient Billing Data        |
| Elixhauser comorbidity count      | Ranges from 0 – 31; categorized as: 3 or less, 4 – 5, 6 – 7, 8 or more                                                                                                                                                                                                               | UPMC Discharge and Inpatient Billing Data        |
| AM-PAC Mobility Score             | Categorized by functional mobility limitations: 6 –unable to perform any tasks, 7-12 – major mobility limitations, 13-18 - moderate mobility limitations, 19-23 – minor mobility limitations, 24 – no mobility limitations<br>Moderate mobility limitations imputed for missing data | UPMC Electronic Health Record                    |
| Discharge Destination             | Categorized as: Home with outpatient services or without home health services, Home with home health services, Skilled nursing facility, Inpatient rehabilitation facility                                                                                                           | UPMC Electronic Health Record                    |
| Therapy Visits (types)            | Categorized as: if billed at least one visit from: Physical Therapy (PT) only, Occupational Therapy (OT) only, Physical Therapy and Occupational Therapy (PT & OT)                                                                                                                   | UPMC Discharge and Inpatient Billing Data        |
| Therapy Visits (amount)           | Categorized as: total number of visits from PT or OT: No visits, 1-3 visits, 4-6 visits, 7 or more visits                                                                                                                                                                            | UPMC Discharge and Inpatient Billing Data        |
| <b>Outcomes</b>                   |                                                                                                                                                                                                                                                                                      |                                                  |
| Died within 30 days               | Yes/no: Died within 30 days with or without an in-system readmission                                                                                                                                                                                                                 | Social Security Death Index (SSDI)               |
| Within system 30-day Readmission  | Yes/no: Readmitted to a UPMC hospital within 30 days                                                                                                                                                                                                                                 | UPMC Discharge and Inpatient Billing Data        |
| Readmitted or died within 30 days | Yes/no: Readmitted within system or died within 30 days                                                                                                                                                                                                                              | UPMC Discharge and Inpatient Billing Data & SSDI |

**eTable 3. Association of Therapy Visits With 30-day Readmission or Death<sup>1</sup> (N=30,746)**

| Variable                            | Odds ratio | 95% confidence interval |      | p-value |
|-------------------------------------|------------|-------------------------|------|---------|
| Therapy Visits: None                | 1.00       | ---                     | ---  | ---     |
| 1 – 3 visits                        | 0.98       | 0.89                    | 1.08 | 0.652   |
| 4 – 6 visits                        | 0.89       | 0.79                    | 1.01 | 0.063   |
| 7 or more visits                    | 0.86       | 0.75                    | 0.98 | 0.028   |
| Seen by PT only                     | 1.00       | ---                     | ---  | ---     |
| Seen by OT only                     | 0.96       | 0.81                    | 1.13 | 0.601   |
| Seen by PT and OT                   | 0.90       | 0.82                    | 0.99 | 0.037   |
| Male                                | 0.99       | 0.93                    | 1.05 | 0.704   |
| Race: White                         | 1.00       | ---                     | ---  | ---     |
| Black                               | 1.07       | 0.97                    | 1.18 | 0.169   |
| Other                               | 0.83       | 0.64                    | 1.06 | 0.136   |
| Age: 18-55 years                    | 1.00       | ---                     | ---  | ---     |
| 56-65 years                         | 1.11       | 1.01                    | 1.23 | 0.028   |
| 66-75 years                         | 1.09       | 0.98                    | 1.22 | 0.098   |
| 76-85 years                         | 1.14       | 1.02                    | 1.28 | 0.022   |
| 86 or more years                    | 1.01       | 0.89                    | 1.14 | 0.907   |
| Insurance: Commercial/Other         | 1.00       | ---                     | ---  | ---     |
| Medicare                            | 1.02       | 0.95                    | 1.10 | 0.569   |
| Medicaid                            | 1.10       | 0.99                    | 1.22 | 0.082   |
| Median Household income: Quartile 1 | 1.00       | ---                     | ---  | ---     |
| Quartile 2                          | 1.09       | 1.00                    | 1.19 | 0.039   |
| Quartile 3                          | 1.01       | 0.93                    | 1.10 | 0.797   |
| Quartile 4                          | 1.18       | 1.07                    | 1.29 | < 0.001 |
| Length of stay: 0-3 days            | 1.00       | ---                     | ---  | ---     |
| >3-6 days                           | 1.26       | 1.14                    | 1.39 | < 0.001 |
| >6-11 days                          | 1.41       | 1.26                    | 1.57 | < 0.001 |
| >11 days                            | 1.57       | 1.38                    | 1.78 | < 0.001 |
| ICU use                             | 1.05       | 0.97                    | 1.13 | 0.225   |
| Mortality risk: Minor               | 1.00       | ---                     | ---  | ---     |
| Moderate                            | 1.61       | 1.38                    | 1.87 | < 0.001 |
| Major                               | 1.75       | 1.50                    | 2.03 | < 0.001 |
| Extreme                             | 1.83       | 1.55                    | 2.15 | < 0.001 |
| Comorbidities: Arrhythmia           | 1.04       | 0.97                    | 1.11 | 0.228   |
| Pulmonary/circulatory               | 1.07       | 0.98                    | 1.16 | 0.143   |
| Neurologic                          | 0.99       | 0.92                    | 1.07 | 0.784   |
| Renal Failure                       | 1.24       | 1.15                    | 1.33 | < 0.001 |
| Liver Disease                       | 1.00       | 0.90                    | 1.12 | 0.967   |
| Cancer                              | 1.46       | 1.34                    | 1.58 | < 0.001 |
| Coagulopathy                        | 1.04       | 0.95                    | 1.13 | 0.435   |
| Obesity                             | 0.89       | 0.82                    | 0.97 | 0.006   |
| Weight Loss                         | 1.07       | 0.99                    | 1.16 | 0.072   |

<sup>1</sup>generalized linear mixed model with random intercept for hospital

**eTable 3. Association of Therapy Visits With 30-day readmission or death, full model<sup>1</sup> (continued)**

| Variable                    | Odds ratio | 95% confidence interval |      | p-value |
|-----------------------------|------------|-------------------------|------|---------|
| Comorbidity count: 0 – 3    | 1.00       | ---                     | ---  | ---     |
| 4 – 5                       | 1.12       | 1.03                    | 1.22 | 0.012   |
| 6 – 7                       | 1.32       | 1.20                    | 1.46 | < 0.001 |
| 8 or more                   | 1.54       | 1.35                    | 1.74 | < 0.001 |
| AM-PAC mobility score: 6    | 1.00       | ---                     | ---  | ---     |
| 7-12                        | 1.05       | 0.94                    | 1.17 | 0.366   |
| 13-18                       | 0.82       | 0.73                    | 0.91 | < 0.001 |
| 19-23                       | 0.94       | 0.84                    | 1.06 | 0.291   |
| 24                          |            |                         |      |         |
| Discharge destination: Home | 1.00       | ---                     | ---  | ---     |
| Home health                 | 1.26       | 1.16                    | 1.37 | < 0.001 |
| Skilled nursing             | 1.33       | 1.21                    | 1.45 | < 0.001 |
| Inpatient rehab             | 1.33       | 1.16                    | 1.52 | < 0.001 |
| Hospital variance           | 0.01       | 0.005                   | 0.03 | ---     |

<sup>1</sup>generalized linear mixed model with random intercept for hospital

**eTable 4. Results of Sensitivity Analyses Excluding Individuals Who Died or Had Missing Data<sup>1</sup>**

| Variable          | Original Model (N=30,746) |      |      |         | Excluding People Who Died within 30 days (N=29,600) |      |      |         | Excluding Individuals with Missing Data (N=28,410) |      |      |         |
|-------------------|---------------------------|------|------|---------|-----------------------------------------------------|------|------|---------|----------------------------------------------------|------|------|---------|
|                   | Odds ratio                |      |      | p-value | Odds ratio                                          |      |      | p-value | Odds ratio                                         |      |      | p-value |
| No Therapy Visits | 1.00                      | ---  | ---  | ---     | 1.00                                                | ---  | ---  | ---     | 1.00                                               | ---  | ---  | ---     |
| 1 – 3 visits      | 0.98                      | 0.89 | 1.08 | 0.652   | 1.03                                                | 0.93 | 1.13 | 0.571   | 0.94                                               | 0.85 | 1.03 | 0.172   |
| 4 – 6 visits      | 0.89                      | 0.79 | 1.01 | 0.063   | 0.95                                                | 0.84 | 1.08 | 0.421   | 0.84                                               | 0.75 | 0.95 | 0.007   |
| 7 or more visits  | 0.86                      | 0.75 | 0.98 | 0.028   | 0.92                                                | 0.80 | 1.06 | 0.240   | 0.90                                               | 0.78 | 1.04 | 0.141   |
| Seen by PT only   | 1.00                      | ---  | ---  | ---     | 1.00                                                | ---  | ---  | ---     | 1.00                                               | ---  | ---  | ---     |
| Seen by OT only   | 0.96                      | 0.81 | 1.13 | 0.601   | 0.93                                                | 0.79 | 1.11 | 0.441   | 1.00                                               | 0.84 | 1.18 | 0.967   |
| Seen by PT and OT | 0.90                      | 0.82 | 0.99 | 0.037   | 0.90                                                | 0.82 | 1.00 | 0.040   | 0.97                                               | 0.88 | 1.07 | 0.573   |

<sup>1</sup>Mixed-effects model with random intercept for hospital, controlling for age; sex; race; insurance; median household income; number of comorbidities; presence of the following comorbidities: arrhythmia, pulmonary circulatory disease, neurological disease, renal failure, liver disease, cancer, coagulopathy, obesity, and weight loss; length of stay; intensive care unit use; mortality risk; AM-PAC mobility scores; discharge destination

**eTable 5. Sensitivity Analysis With Total Visits Categorized by Quartile Distribution<sup>1</sup> (N=30,746)**

| Variable          | Odds ratio | 95% confidence interval |      | p-value |
|-------------------|------------|-------------------------|------|---------|
| No Therapy Visits | 1.00       | ---                     | ---  | ---     |
| 1 – 2 visits      | 0.99       | 0.90                    | 1.10 | 0.922   |
| 3 – 4 visits      | 0.91       | 0.81                    | 1.02 | 0.117   |
| 5 – 8 visits      | 0.87       | 0.77                    | 0.99 | 0.039   |
| 9 or more visits  | 0.76       | 0.65                    | 0.88 | 0.000   |
| Seen by PT only   | 1.00       | ---                     | ---  | ---     |
| Seen by OT only   | 0.94       | 0.80                    | 1.12 | 0.507   |
| Seen by PT and OT | 0.94       | 0.85                    | 1.03 | 0.173   |

<sup>1</sup>Mixed-effects model with random intercept for hospital, controlling for age; sex; race; insurance; median household income; number of comorbidities; presence of the following comorbidities: arrhythmia, pulmonary circulatory disease, neurological disease, renal failure, liver disease, cancer, coagulopathy, obesity, and weight loss; length of stay; intensive care unit use; mortality risk; AM-PAC mobility scores; discharge destination



**eTable 6. Cox Regression<sup>1</sup> Analysis of the Association of Therapy Visits With 30-day Readmission or Death (N=30,746)**

| Variable                 |                       | Hazard Ratio | 95% confidence interval |      | p-value |
|--------------------------|-----------------------|--------------|-------------------------|------|---------|
| Therapy Visits:          | None                  | 1.00         | ---                     | ---  | ---     |
|                          | 1 – 3 visits          | 0.98         | 0.87                    | 1.10 | 0.683   |
|                          | 4 – 6 visits          | 0.90         | 0.80                    | 1.01 | 0.062   |
|                          | 7 or more visits      | 0.86         | 0.77                    | 0.96 | 0.006   |
| Seen by PT only          |                       | 1.00         | ---                     | ---  | ---     |
| Seen by OT only          |                       | 0.94         | 0.83                    | 1.07 | 0.378   |
| Seen by PT and OT        |                       | 0.93         | 0.86                    | 1.01 | 0.086   |
| Male                     |                       | 0.99         | 0.94                    | 1.04 | 0.606   |
| Race:                    | White                 | 1.00         | ---                     | ---  | ---     |
|                          | Black                 | 1.08         | 0.99                    | 1.17 | 0.066   |
|                          | Other                 | 0.86         | 0.71                    | 1.04 | 0.127   |
| Age:                     | 18-55 years           | 1.00         | ---                     | ---  | ---     |
|                          | 56-65 years           | 1.09         | 0.99                    | 1.21 | 0.075   |
|                          | 66-75 years           | 1.04         | 0.94                    | 1.14 | 0.458   |
|                          | 76-85 years           | 1.07         | 0.94                    | 1.21 | 0.323   |
|                          | 86 or more years      | 0.94         | 0.83                    | 1.07 | 0.338   |
| Insurance:               | Commercial/Other      | 1.00         | ---                     | ---  | ---     |
|                          | Medicare              | 1.09         | 0.93                    | 1.27 | 0.284   |
|                          | Medicaid              | 1.11         | 0.95                    | 1.28 | 0.182   |
| Median Household income: | Quartile 1            | 1.00         | ---                     | ---  | ---     |
|                          | Quartile 2            | 1.11         | 1.01                    | 1.22 | 0.039   |
|                          | Quartile 3            | 1.00         | 0.89                    | 1.12 | 0.988   |
|                          | Quartile 4            | 1.11         | 0.95                    | 1.30 | 0.194   |
| Length of stay:          | 0-3 days              | 1.00         | ---                     | ---  | ---     |
|                          | >3-6 days             | 1.22         | 1.09                    | 1.36 | < 0.001 |
|                          | >6-11 days            | 1.36         | 1.24                    | 1.48 | < 0.001 |
|                          | >11 days              | 1.50         | 1.31                    | 1.73 | < 0.001 |
| ICU use                  |                       | 1.03         | 0.96                    | 1.10 | 0.435   |
| Mortality risk:          | Minor                 | 1.00         | ---                     | ---  | ---     |
|                          | Moderate              | 1.59         | 1.40                    | 1.82 | < 0.001 |
|                          | Major                 | 1.72         | 1.49                    | 1.99 | < 0.001 |
|                          | Extreme               | 1.78         | 1.56                    | 2.02 | < 0.001 |
| Comorbidities:           | Arrhythmia            | 1.04         | 0.97                    | 1.11 | 0.304   |
|                          | Pulmonary/circulatory | 1.05         | 0.99                    | 1.11 | 0.084   |
|                          | Neurologic            | 0.99         | 0.94                    | 1.04 | 0.700   |
|                          | Renal Failure         | 1.20         | 1.15                    | 1.26 | < 0.001 |
|                          | Liver Disease         | 1.00         | 0.91                    | 1.11 | 0.942   |
|                          | Cancer                | 1.40         | 1.31                    | 1.49 | < 0.001 |
|                          | Coagulopathy          | 1.04         | 0.92                    | 1.17 | 0.533   |
|                          | Obesity               | 0.90         | 0.84                    | 0.96 | 0.001   |
|                          | Weight Loss           | 1.04         | 0.95                    | 1.15 | 0.384   |

**eTable 6. Cox Regression Analysis<sup>1</sup> of the Association of Therapy Visits With 30-day Readmission or Death (continued)**

| Variable               |                 | Odds ratio | 95% confidence interval |      | p-value |
|------------------------|-----------------|------------|-------------------------|------|---------|
| Comorbidity count:     | 0 – 3           | 1.00       | ---                     | ---  | ---     |
|                        | 4 – 5           | 1.10       | 0.97                    | 1.25 | 0.140   |
|                        | 6 – 7           | 1.27       | 1.09                    | 1.49 | 0.002   |
|                        | 8 or more       | 1.43       | 1.16                    | 1.76 | 0.001   |
| AM-PAC mobility score: | 6               | 1.00       | ---                     | ---  | ---     |
|                        | 7-12            | 1.04       | 0.93                    | 1.16 | 0.461   |
|                        | 13-18           | 0.85       | 0.75                    | 0.95 | 0.006   |
|                        | 19-23           | 0.96       | 0.85                    | 1.08 | 0.524   |
|                        | 24              | 0.87       | 0.77                    | 0.99 | 0.037   |
| Discharge destination: | Home            | 1.00       | ---                     | ---  | ---     |
|                        | Home health     | 1.25       | 1.13                    | 1.40 | < 0.001 |
|                        | Skilled nursing | 1.30       | 1.21                    | 1.40 | < 0.001 |
|                        | Inpatient rehab | 1.32       | 1.19                    | 1.46 | < 0.001 |

<sup>1</sup>clustering on hospital; global test of proportional hazards assumption, chi-square = 233.32, p<0.001.
